# Supplementary material
Source: PubMed Central journal article supplement (PMC2323281)

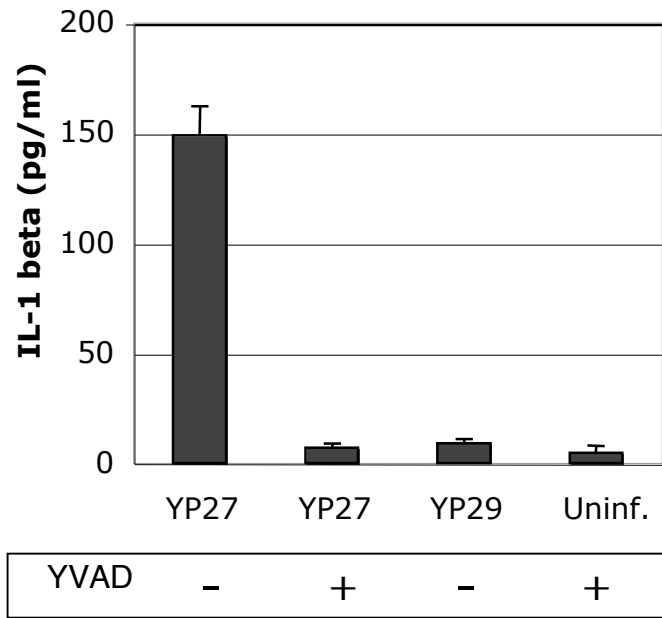

Supplement: ppat.0040003.sg001.pdf [file ppat.0040003.sg001.pdf]

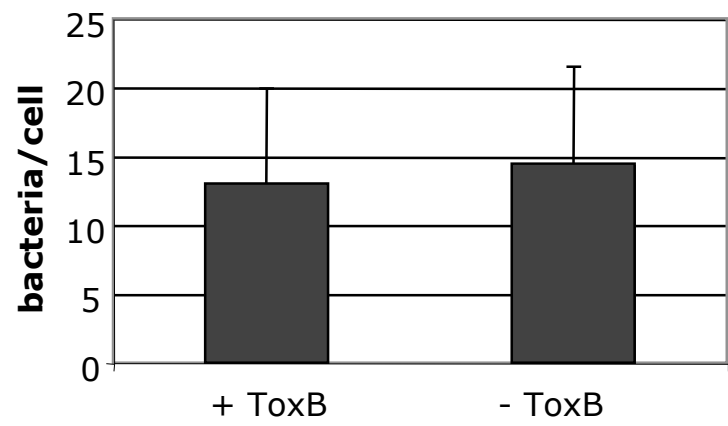

Supplement: ppat.0040003.sg002.pdf [file ppat.0040003.sg002.pdf]

A

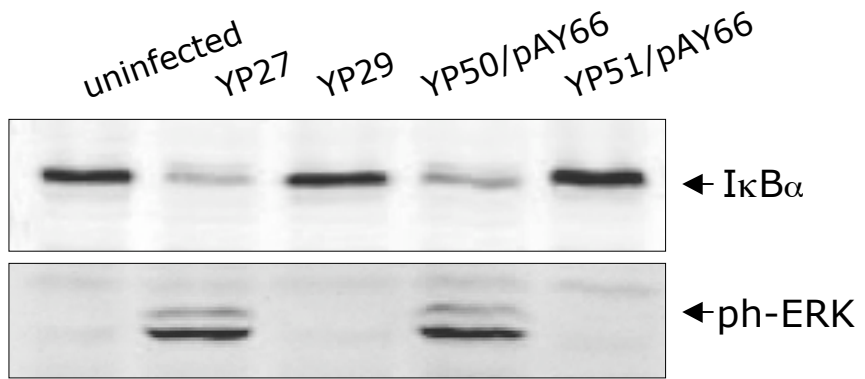

Supplement: ppat.0040003.sg003.pdf [file ppat.0040003.sg003.pdf]

**A**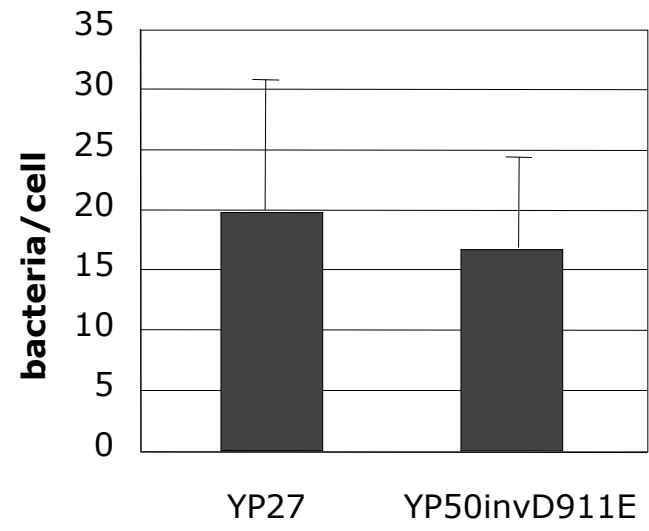**B**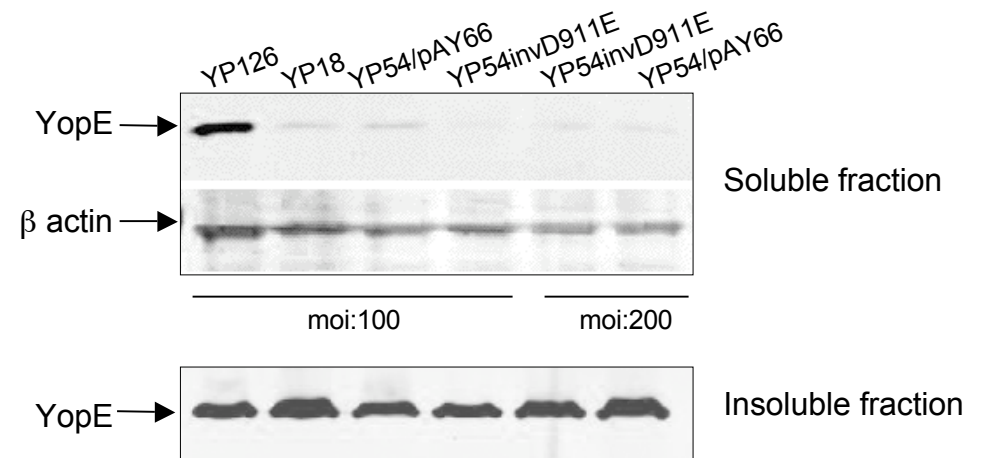

Supplement: ppat.0040003.sg004.pdf [file ppat.0040003.sg004.pdf]

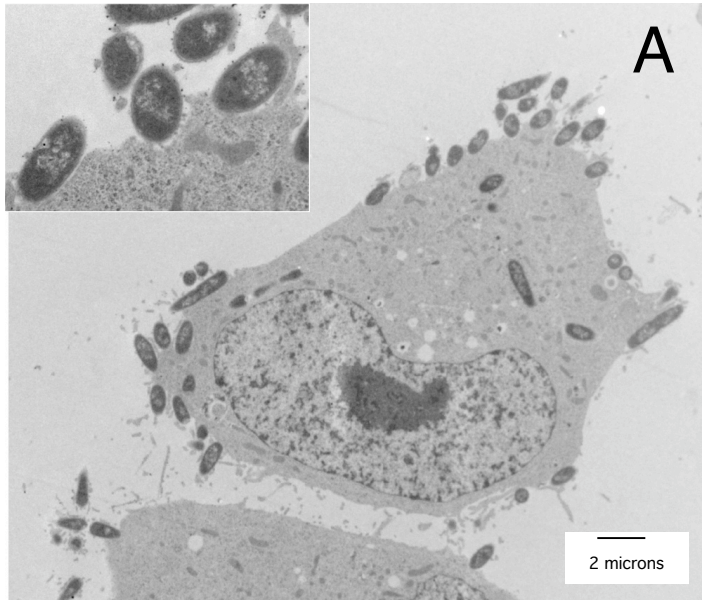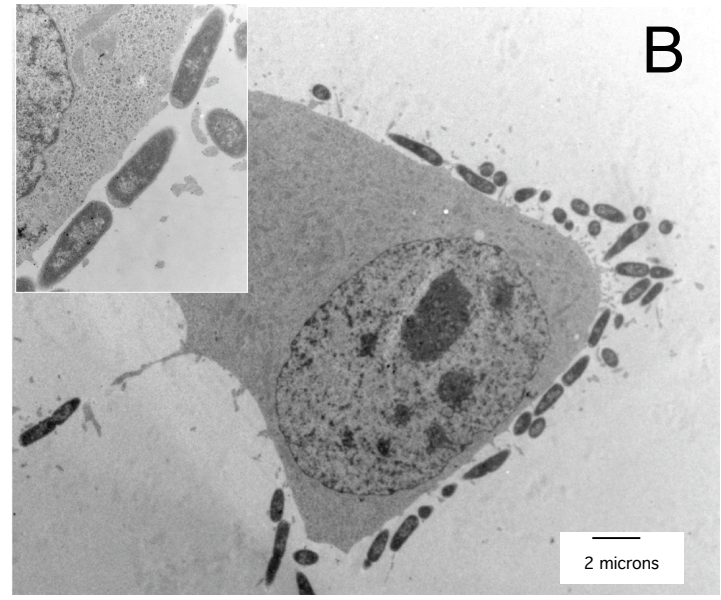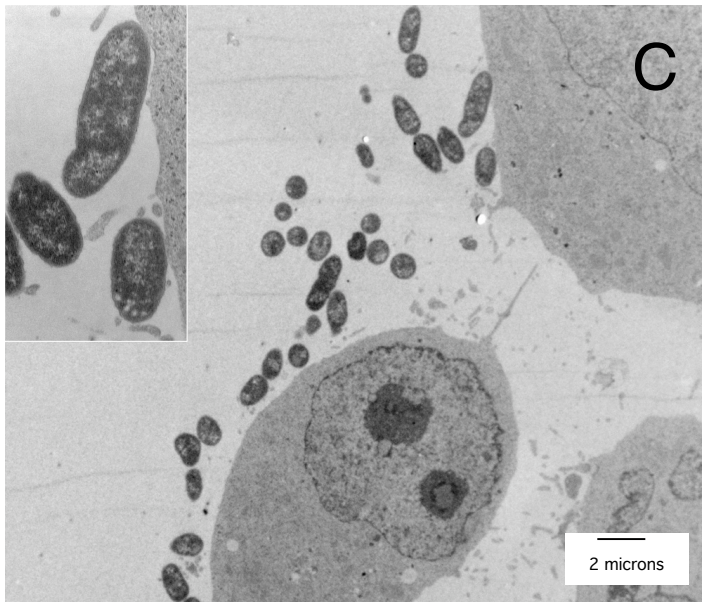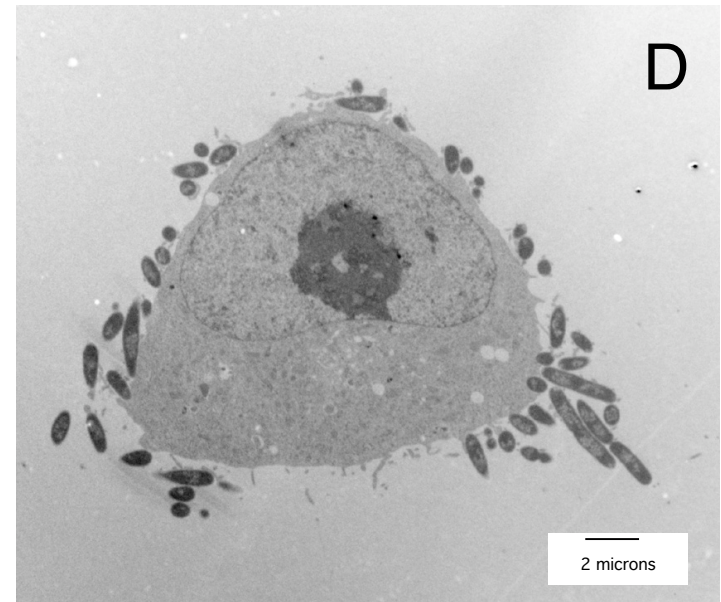

Supplement: ppat.0040003.sg005.pdf [file ppat.0040003.sg005.pdf]

A

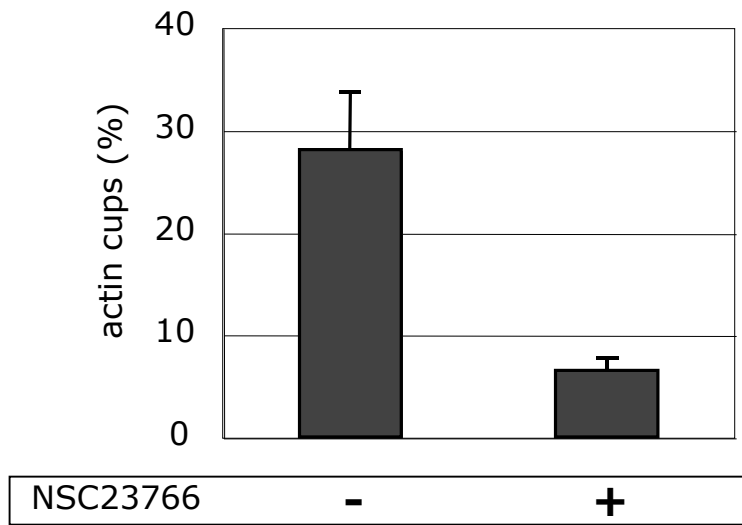

B

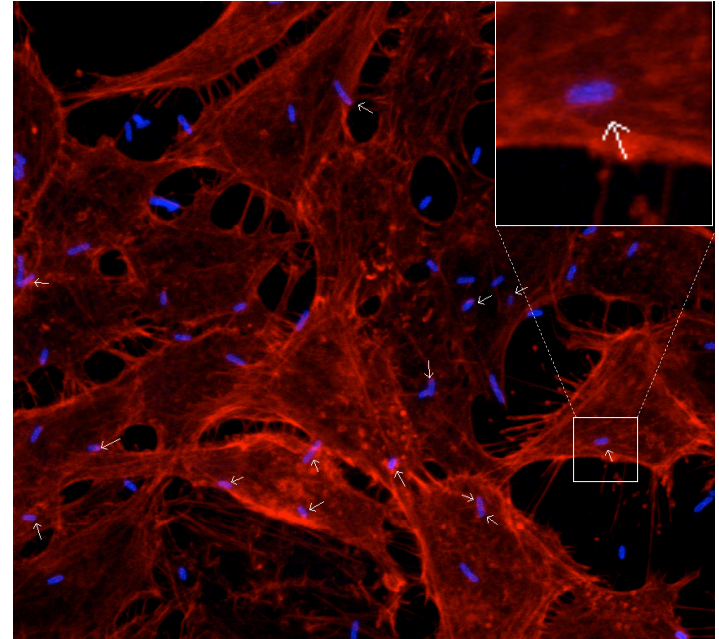

Supplement: ppat.0040003.sg006.pdf [file ppat.0040003.sg006.pdf]

A

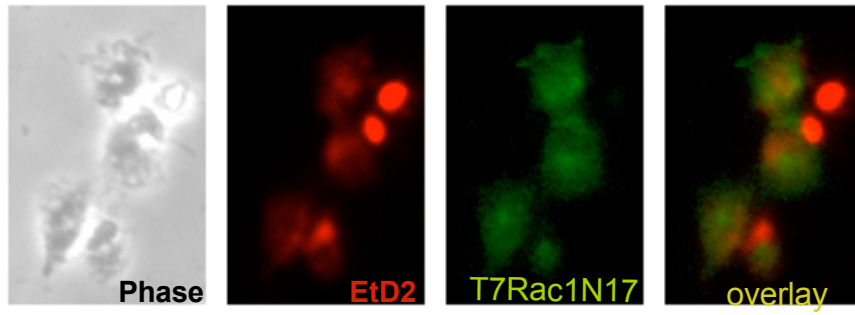

B

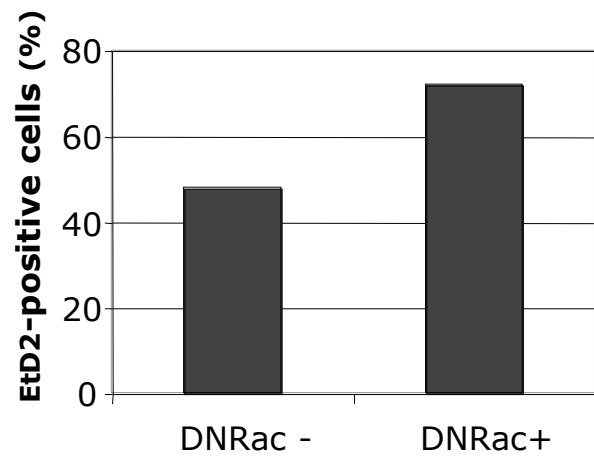

Supplement: ppat.0040003.sg007.pdf [file ppat.0040003.sg007.pdf]

**A**

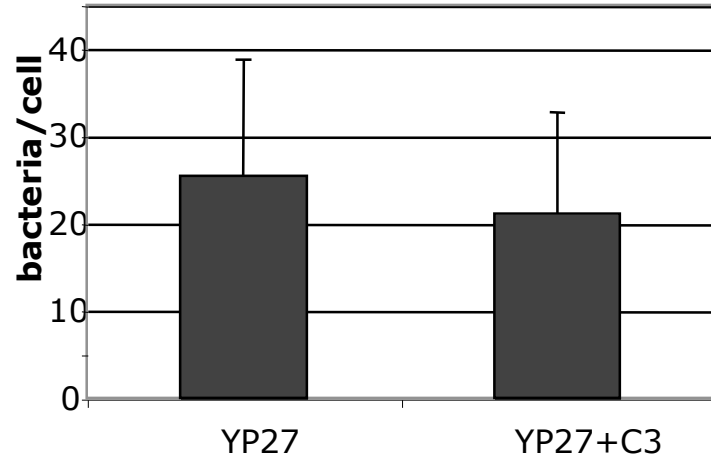

**B**

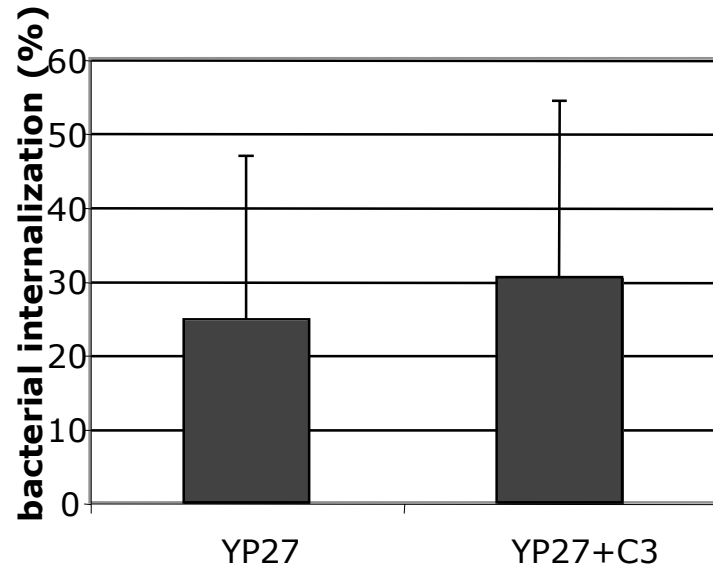

Supplement: ppat.0040003.sg008.pdf [file ppat.0040003.sg008.pdf]
